1 **Article summary line:** Characterizing Delta SARS-CoV-2 infection and host response in free-  
2 ranging white-tailed deer in southern Québec, Canada

3 **Running title:** SARS-CoV-2, White-tailed deer, Québec

4 **Key words:** SARS-CoV-2, COVID-19, White-Tailed Deer, Québec, Canada, Infection,  
5 Transcriptomics, Wildlife, Genomics

6  
7 **Title:** Genomic and transcriptomic characterization of Delta SARS-CoV-2 infection in free-  
8 ranging white-tailed deer (*Odocoileus virginianus*)

9  
10 **Authors:** Jonathon D. Kotwa<sup>1</sup>, Briallen Lobb<sup>2</sup>, Ariane Massé<sup>3\*</sup>, Marianne Gagnier<sup>3</sup>, Patryk  
11 Aftanas<sup>1</sup>, Arinjay Banerjee<sup>2,4,5,6,7</sup>, Andra Banete<sup>1</sup>, Juliette Blais-Savoie<sup>1</sup>, Jeff Bowman<sup>8</sup>, Tore  
12 Buchanan<sup>8</sup>, Hsien-Yao Chee<sup>1,9</sup>, Peter Kruczkiewicz<sup>10</sup>, Finlay Maguire<sup>11,12,13</sup>, Allison J.  
13 McGeer<sup>6,14</sup>, Kuganya Nirmalarajah<sup>1</sup>, Catherine Soos<sup>15,16</sup>, Lily Yip<sup>1</sup>, L. Robbin Lindsay<sup>17</sup>,  
14 Andrew C. Doxey<sup>2</sup>, Oliver Lung<sup>10,18</sup>, Bradley Pickering<sup>10,19,20\*</sup>, Samira Mubareka<sup>1,6\*</sup>

15  
16 **Affiliations:** <sup>1</sup> Sunnybrook Research Institute, Toronto, Ontario, Canada; <sup>2</sup> Department of  
17 Biology, University of Waterloo, Waterloo, Ontario, Canada; <sup>3</sup> Ministère de l'Environnement, de  
18 la Lutte contre les changements climatiques, de la Faune et des Parcs, Québec City, Québec,  
19 Canada; <sup>4</sup> Vaccine and Infectious Disease Organization, University of Saskatchewan, Saskatoon,  
20 Saskatchewan, Canada; <sup>5</sup> Department of Veterinary Microbiology, University of Saskatchewan,  
21 Saskatoon, Saskatchewan, Canada; <sup>6</sup> Department of Laboratory Medicine and Pathobiology,  
22 Temerty Faculty of Medicine, University of Toronto, Toronto, Ontario, Canada; <sup>7</sup> Department of  
23 Biochemistry and Molecular Biology, Faculty of Medicine, University of British Columbia,  
24 Vancouver, British Columbia, Canada; <sup>8</sup> Wildlife Research and Monitoring Section, Ontario  
25 Ministry of Natural Resources and Forestry, Peterborough, Ontario, Canada; <sup>9</sup> Global Health  
26 Research Center and Division of Natural and Applied Sciences, Duke Kunshan University,  
27 Kunshan, Jiangsu, China; <sup>10</sup> National Centre for Foreign Animal Disease, Canadian Food  
28 Inspection Agency, Winnipeg, Manitoba, Canada; <sup>11</sup> Faculty of Computer Science, Dalhousie  
29 University, Halifax, Nova Scotia, Canada; <sup>12</sup> Department of Community Health & Epidemiology,  
30 Faculty of Medicine, Dalhousie University, Halifax, Nova Scotia, Canada; <sup>13</sup> Shared Hospital  
31 Laboratory, Toronto, Ontario, Canada; <sup>14</sup> Sinai Health System, Toronto, Ontario, Canada; <sup>15</sup>  
32 Ecotoxicology and Wildlife Health Division, Environment and Climate Change Canada,  
33 Saskatoon, Saskatchewan, Canada; <sup>16</sup> Department of Veterinary Pathology, Western College of  
34 Veterinary Medicine, University of Saskatchewan, Saskatoon, Saskatchewan, Canada; <sup>17</sup>  
35 National Microbiology Laboratory, Public Health Agency of Canada, Winnipeg, Manitoba,  
36 Canada; <sup>18</sup> Department of Biological Sciences, University of Manitoba, Winnipeg, Manitoba,  
37 Canada; <sup>19</sup> Department of Veterinary Microbiology and Preventative Medicine, College of  
38 Veterinary Medicine, Iowa State University, Ames, Iowa, USA; <sup>20</sup> Department of Medical  
39 Microbiology and Infectious Diseases, University of Manitoba, Winnipeg, Manitoba, Canada

40  
41 \* Co-corresponding authors: Email: samira.mubareka@sunnybrook.ca (S. Mubareka);  
42 bradley.pickering@canada.ca (B. Pickering); ariane.masse@mffp.gouv.qc.ca (A. Massé)

43  
44 **Abstract (150 words max)**

45 White-tailed deer are susceptible to SARS-CoV-2 and represent a highly important species for  
46 surveillance. Nasal swabs and retropharyngeal lymph nodes from white-tailed deer (n=258)

47 collected in November 2021 from Québec, Canada were analyzed for SARS-CoV-2 RNA. We  
48 employed viral genomics and transcriptomics to further characterize infection and investigate  
49 host response to infection. We detected Delta SARS-CoV-2 (AY.44) in deer from the Estrie  
50 region; sequences clustered with human sequences from GISAID collected in October 2021 from  
51 Vermont, USA, which borders this region. Mutations in the S-gene and a deletion in ORF8  
52 encoding a truncated protein were detected. Host expression patterns in SARS-CoV-2 infected  
53 deer were associated with the innate immune response, including signalling pathways related to  
54 anti-viral, pro- and anti-inflammatory signalling, and host damage. Our findings provide  
55 preliminary insights of host response to SARS-CoV-2 infection in deer and underscores the  
56 importance of ongoing surveillance of key wildlife species for SARS-CoV-2.

57

### 58 **Main text**

59 White-tailed deer (WTD) are considered a highly important species for SARS-CoV-2  
60 surveillance as a result of widespread experimental and epidemiological evidence of SARS-  
61 CoV-2 exposure, infection, and transmission across North America<sup>1-11</sup>. Multiple focally  
62 distributed spillover events have been observed, with whole genome sequencing (WGS) analyses  
63 initially revealing SARS-CoV-2 lineages that reflect those circulating in humans at the same  
64 time<sup>4,5</sup>. Multiple studies have also documented evidence for onward and sustained deer-to-deer  
65 transmission<sup>1,6,10</sup>. This includes circulation of nearly extinct SARS-CoV-2 lineages (Alpha and  
66 Gamma) in WTD in New York and Pennsylvania, USA, with a notable time lapse between  
67 detection of these variants in humans and WTD<sup>1,6</sup>. In Ontario, Canada, we previously identified  
68 a highly divergent SARS-CoV-2 variant circulating in WTD (B.1.641) with evidence of deer-to-  
69 human transmission<sup>10</sup>; this finding emphasizes ongoing concerns over the emergence and  
70 accumulation of mutations in SARS-CoV-2 while circulating in novel animal hosts<sup>12</sup>. This  
71 introduces the possibility of further divergent evolution and spillback into humans, potentially  
72 undermining the effectiveness of medical countermeasures such as antivirals and vaccines<sup>13-15</sup>.

73 The growing evidence of SARS-CoV-2 circulation among WTD in North America is  
74 suggestive of a new non-human maintenance population or reservoir for the virus. Despite this  
75 fundamental change to the ecology of SARS-CoV-2, there is still a dearth of knowledge about  
76 the course of infection in WTD, the host-immune response, and resultant evolutionary pressures.  
77 For a species to be a competent maintenance host or viral reservoir, the virus needs to persist in a  
78 population. One way to achieve this would be for the host to develop immune tolerance against a  
79 virus, facilitating virus persistence. For example, bats are broadly considered to be important  
80 reservoir hosts for several viruses and are capable of harbouring high viral loads with minimal  
81 inflammation and pathology. This is attributed to a balance between immune tolerance (e.g,  
82 dampened Stimulator of Interferon Genes (STING) and inflammasome pathways) and host-  
83 defence response (e.g., constitutive expression of interferons (IFNs) and interferon stimulating  
84 genes [ISGs])<sup>16-19</sup>. Alternatively, persistence in the population could be achieved through  
85 transmission to naive individuals regardless of host-immunity. There is a need to integrate data  
86 on host-immune response with epidemiological and ecological insights to understand whether  
87 WTD could represent a competent non-human maintenance population or reservoir for SARS-  
88 CoV-2<sup>20,21</sup> and to discern the implications of species-adapted viruses for human health.

89 We investigated SARS-CoV-2 in WTD in southern Québec, Canada as part of a broader  
90 pan-Canadian approach to investigate SARS-CoV-2 spillover into wildlife. We employ viral  
91 genomics and transcriptomics to further characterise SARS-CoV-2 infection and host response to

92 infection in comparison to human hosts who clearly exhibit inflammation and disease,  
93 anticipating a more subclinical immune profile in infected deer.

94

## 95 **Materials and Methods**

### 96 *Sample collection and study region*

97 White-tailed deer were sampled during the scheduled hunting season after harvesting by licensed  
98 hunters. Samples were collected at two big game registration stations in Dunham and  
99 Brownsburg, Québec (**Figure S1**) when harvested and cleaned carcasses were presented for  
100 registration; carcasses were returned to the hunters after sampling. Thus, no clinical or post-  
101 mortem examination was possible. The Brownsburg station included collection of  
102 retropharyngeal lymph node (RPLN) tissues for Chronic Wasting Disease surveillance conducted  
103 by the Ministère de l'Environnement, de la Lutte contre les changements climatiques, de la  
104 Faune et des Parcs (MELCCFP) in free-ranging WTD in Québec in early November 2021<sup>22</sup>. We  
105 collected nasal swabs in 1 mL universal transport media and retropharyngeal lymph node  
106 (RPLN) tissues were collected in dry 2 mL tubes; both sample types were stored at -80°C prior to  
107 analysis. Sex, life stage (juvenile or adult) and geographic location of harvest (latitude and  
108 longitude) were recorded for each animal.

109

### 110 *RT-PCR screening and detection*

111 RNA extractions and reverse-transcription polymerase chain reaction (RT-PCR) were performed  
112 as described previously<sup>10</sup>. Briefly, two targets were used for SARS-CoV-2 RNA detection: the  
113 5' untranslated region (UTR) and the envelope (E) gene<sup>23</sup>. All samples were run in duplicate and  
114 samples with cycle thresholds (Ct) <40 for both SARS-CoV-2 targets and armored RNA  
115 enterovirus in at least one replicate were considered positive. Positive samples were further  
116 analyzed for a human RNase P gene target to rule out potential contamination<sup>24</sup>.

117 Original material from positive samples was sent to the Canadian Food Inspection  
118 Agency (CFIA) for confirmatory RT-PCR testing for reporting to the World Organization for  
119 Animal Health (WOAH)<sup>25</sup> as described previously<sup>10</sup>. Briefly, confirmatory RT-PCR was  
120 performed using primers and probe specific for both SARS-CoV-2 E and nucleocapsid (N) genes  
121<sup>24</sup>. Samples with Ct <36 for both gene targets were reported to WOAHA.

122 Confidence intervals (CI) for SARS-CoV-2 prevalence of infection were estimated using  
123 Stata/SE 15.1 (StataCorp, College Station, Texas, USA; <http://www.stata.com>) with the Agresti-  
124 Coull CI method<sup>26</sup>. Diagnostic data were plotted on a map of southern Québec according to the  
125 latitude and longitude of each WTD with human population density<sup>27</sup> and deer harvesting  
126 density data<sup>28</sup>. Graphic displays were produced via QGIS 3.28.2 (Quantum GIS Development  
127 Team; <http://www.qgis.org>).

128

### 129 *SARS-CoV-2 amplification and sequencing*

130 SARS-CoV-2 whole genome sequencing was performed at Sunnybrook Research Institute (SRI)  
131 and analyzed at CFIA. Following protocols used by Pickering et al. (2022), all RT-PCR-positive  
132 samples were independently 149bp paired-end sequenced using ARTICv3 on Illumina MiniSeq  
133 (see supplemental methods for more details).

134 Paired-end Illumina reads for samples 4055, 4204, 4205 and 4249 were analyzed using  
135 the nf-core/viralrecon Nextflow workflow (v2.2)<sup>29-31</sup> and lineages assigned with Pangolin  
136 (v3.1.17) (see supplemental methods for more details).

137 Phylogenetic analysis was performed with the WTD consensus sequences generated by  
138 nf-core/viralrecon and 93 closely related NCBI and GISAID<sup>32-34</sup> sequences identified by  
139 USHER<sup>35</sup> using a dataset of 14,323,766 genomes from GISAID, GenBank, COG-UK and CNCB  
140 (2023-03-28; <https://genome.ucsc.edu/cgi-bin/hgPhyloPlace>). Multiple sequence alignment  
141 (MSA) was performed with Nextalign (v2.13.0)<sup>36</sup> of the 4 WTD, 91 NCBI, 2 GISAID and  
142 Wuhan-Hu-1 (MN908947.3) sequences. A maximum-likelihood tree was inferred using IQ-  
143 TREE (v2.2.0.3)<sup>37,38</sup> from the Nextalign MSA with Wuhan-Hu-1 reference strain (MN908947.3)  
144 as the outgroup. The best-fit substitution model was determined by IQ-TREE ModelFinder<sup>39</sup> to  
145 be GTR+F+I+R5. The IQ-TREE phylogenetic tree was pruned with BioPython (v1.79)<sup>40</sup> for  
146 visualization with the R ggtree library (v3.2.0)<sup>41</sup>. Nexclade CLI (v2.13.0)<sup>36</sup> was used to identify  
147 amino acid substitutions and deletions in the sequences.

#### 148 149 *Virus isolation*

150 Virus isolation was performed on RT-PCR-positive nasal swabs in containment level 3 at the  
151 University of Toronto. Vero E6 cells were seeded at a concentration of  $3 \times 10^5$  cells/well in a six  
152 well-plate. The next day, 250  $\mu$ L of sample with 16  $\mu$ g/mL TPCK-treated trypsin (New England  
153 BioLabs), 2X penicillin and streptomycin and 2X antibiotic-antimycotic (Wisent;  
154 <https://www.wisentbioproducts.com/en/>) was inoculated onto cells. Plates were returned to a  
155 37°C, 5% CO<sub>2</sub> incubator for 1 hour and rocked every 15 minutes. After 1 hour, the inoculum was  
156 removed and replaced with DMEM containing 2% FBS, 6  $\mu$ g/mL TPCK-treated trypsin, 2X  
157 penicillin/streptomycin, and 2X antibiotic-antimycotic. Cells were observed daily under a light  
158 microscope for cytopathic effect for 5 days post infection. The RT-PCR assay was used to  
159 confirm SARS-CoV-2 isolation from supernatant. Comparison of isolate sequences to their  
160 original nasal swab sample was conducted: cDNA was amplified using ARTIC v4 primer pools  
161 (<https://github.com/artic-network/artic-ncov2019>) and variant calling results were generated  
162 using the SIGNAL (SARS-CoV-2 Illumina GeNome Assembly Line) pipeline v1.5.0<sup>42</sup>; these  
163 were then compared to variant calling data for the original samples using this analysis workflow.

#### 164 165 *RNA-sequencing of white-tailed deer nasal swabs*

166 Sufficient material was available for two RT-PCR positive nasal swab samples (4055, 4249) for  
167 RNA-sequencing (RNA-seq). As such, eight total RNA samples, including two SARS-CoV-2  
168 RT-PCR-positive and six RT-PCR-negative samples, were submitted for RNA sequencing  
169 (RNA-seq) at the Donnelly Sequencing Centre at the University of Toronto  
170 (<http://ccbr.utoronto.ca/donnelly-sequencing-centre>). DNase-treated total RNA was quantified  
171 using Qubit RNA HS (cat # Q32852, Thermo Fisher Scientific Inc., Waltham, USA) fluorescent  
172 chemistry and 5 ng was used to obtain the RNA integrity number (RIN) using the High  
173 Sensitivity RNA ScreenTape (cat # 5067-5579, Agilent Technologies Inc., Santa Clara, USA).  
174 Lowest RIN was 1.5; median RIN score was 3. RNA-seq libraries were prepared from RNA  
175 samples (150ng) using the NEBNext rRNA Depletion Kit v2 (Human/Mouse/Rat) (NEB Cat#  
176 E7405) in conjunction with NEBNext Ultra II RNA Library Prep Kit for Illumina (NEB Cat#  
177 E7765). To facilitate the design of deer-specific ssDNA probes Custom RNA Depletion primers  
178 were designed using the tool <https://depletiondesign.neb.com/>. These were then substituted for  
179 the oligos provided in the kit. Ribosomal RNA-depleted libraries had a mean concentration of  
180 15.2ng/ $\mu$ L. 1 $\mu$ L top stock of each purified final library was run on an Agilent Bioanalyzer  
181 dsDNA High Sensitivity chip (cat # 5067-4626, Agilent Technologies Inc., Santa Clara, USA).  
182 The libraries were quantified using the Quant-iT dsDNA high-sensitivity (cat # Q33120, Thermo



183 Fisher Scientific Inc., Waltham, USA) and were pooled at equimolar ratios after size-adjustment.  
184 The final pool was run on an Agilent Bioanalyzer dsDNA High Sensitivity chip and quantified  
185 using NEBNext Library Quant Kit for Illumina (cat # E7630L, New England Biolabs, Ipswich,  
186 USA).

187 The quantified pool was hybridized at a final concentration of 320 pM and sequenced  
188 paired end 150bp on the Illumina NovaSeq6000 platform using a SP flowcell at a depth of 100M  
189 reads per sample.

#### 190 *RNA-seq bioinformatic analysis of white-tailed deer nasal swabs*

191 Raw reads were trimmed with *fastp* v0.21.0<sup>43</sup>, with a front 9 nucleotide trim for R1 and R2  
192 based on a FastQC v0.11.4 quality inspection. To remove the deer sequences for microbial  
193 profiling, we used STAR v2.5.2b<sup>44</sup> to create an index of *Odocoileus virginianus texanus*  
194 (GCF\_002102435.1; also used as a WTD reference in O'Hara et al., 2022) with a sjdbOverhang  
195 of 100 and align the fastp-processed paired-end reads to this index. Deer-aligned reads were  
196 removed with BMAP v38.96 filterbyname.sh<sup>46</sup>. The deer-removed samples were run against  
197 the PlusPF pre-built database from May, 17, 2021, consisting of bacteria, archaea, viruses,  
198 human, protozoa, and fungi, with Kraken 2 v2.1.2<sup>47</sup>. Species abundance was computed with  
199 Bracken v2.6.0<sup>48</sup>. Distance-based clustering on the species and deer samples was done with the  
200 pheatmap v1.0.12 package in R v4.1.1 and applied to a dot plot displaying the relative abundance  
201 of species within the community.

202 For the differential gene expression analysis, the fastp-process paired-end reads were run  
203 in the mapping-based mode against a *Odocoileus virginianus texanus* (GCF\_002102435.1)  
204 decoy-aware (genome as the decoy sequence) transcriptome using Salmon v1.4<sup>49</sup> with the  
205 validateMappings setting. The quantification files were imported into R (v4.1.1) and a gene  
206 mapping file was created with the makeTxDbFromGFF from the DESeq2 v1.34.0 package<sup>50</sup>.  
207 Transcript quantifications were merged to the gene-level with tximport using the  
208 lengthScaledTPM setting. Low count genes with less than 10 counts were pre-filtered out to  
209 improve DESeq2 performance as recommended in the DESeq2 vignette. The differential gene  
210 expression analysis was done with the DESeq2 function based on the RT-PCR test results as  
211 factor levels. Variance-stabilizing transformation (VST) normalized gene expression for genes  
212 that were significantly differentially expressed based on the adjusted *p*-value and had a log<sub>2</sub> fold  
213 change greater than 3 were displayed with gene expression scaling (done with the scale function)  
214 in a heatmap with the pheatmap package. The plotPCA function from the DESeq2 package was  
215 used to plot a PCA of the VST transformed gene expression profiles. Genes identified as  
216 significantly (adjusted *p*-value) up or down-expressed were run on the Database for Annotation,  
217 Visualization and Integrated Discovery (DAVID)<sup>51</sup> on Oct. 7 2022 to identify functional terms  
218 (including Gene Ontology terms) enriched in the significantly up and down-expressed gene set  
219 over a white-tailed deer genome (GCF\_002102435.1) background. Notably, these genes and  
220 associated processes have been defined using human and mouse studies and as such are used as a  
221 surrogate to define likely processes in deer.

222 To compare the deer results with a human cohort, OrthoFinder v2.5.2<sup>52</sup> was run on a  
223 WTD (GCF\_002102435.1) and human (GRCh38.p13) proteome, with the proteins mapped back  
224 to gene names. The log<sub>2</sub> fold change values from a previous DESeq2 analysis of RNA-seq  
225 human COVID-19 infection gene expression<sup>53</sup>, was compared to the deer DESeq2 results.  
226 Briefly, the human RNA-seq transcriptomics dataset is derived from 50 SARS-CoV-2-positive  
227 and 13 SARS-CoV-2 negative individuals; samples were collected from a clinical cohort in the  
228 Greater Toronto Area between October 2020 and October 2021<sup>53</sup>. The SARS-CoV-2 positive

229 individuals include 16 outpatients, 16 hospitalized (non-ICU) patients, and 18 hospitalized ICU  
230 patients<sup>53</sup>. The GOBP\_INNATE\_IMMUNE\_RESPONSE human gene set from the Human  
231 Molecular Signatures Database (MSigDB) C5: ontology<sup>54</sup> was used to subset the genes  
232 investigated and the correlation between the human and deer immune system log<sub>2</sub> fold change  
233 values was calculated with the cor.test function in R v4.1.1.

234

235 *IFITM1* comparison within *O. virginianus* and mammalian *IFITM1* phylogenetics

236 *IFITM1* duplication in other *O. virginianus* genomes (GCA\_023699985.2 and  
237 GCA\_014726795.1) was confirmed via BLASTN searches of those genomes with the two  
238 *IFITM1* sequences (NW\_018336621.1:109564-110759 and NW\_018336621.1:c138855-136683  
239 for LOC110149600 and LOC110149612, respectively) from *O. virginianus texanus*  
240 (GCF\_002102435.1). Assemblies GCA\_000191625.1 and GCA\_000191605.1 were not included  
241 as they were extremely small and only fragments of each *IFITM1* gene were able to be detected.  
242 As for the *IFITM1* sequences across mammals, the *IFITM1* HomoloGene group 74501, that  
243 includes human, chimpanzee, macaque, wolf, and cow *IFITM1* sequences was aligned with  
244 MUSCLE v3.8.425<sup>55</sup> to other similar proteins in Boreoeutheria, including the *O. virginianus*  
245 *texanus* *IFITM1* proteins. A RAxML-pthreads v8.2.12<sup>56</sup> tree with the PROTGAMMAAUTO  
246 setting and the MRE-based Bootstrapping criterion was generated from the alignment, with JTT  
247 likelihood with empirical base frequencies being the best-scoring amino acid model for the tree.  
248 A nucleotide alignment including coding sequences from all proteins in the tree, as well as the  
249 other *O. virginianus* *IFITM1* coding sequences, was created with MUSCLE v3.8.425 and  
250 subsequently trimmed to the best conserved length with codon alignment corrected. A Fixed  
251 Effects Likelihood analysis<sup>57</sup> on this alignment generated with the Datamonkey Adaptive  
252 Evolution Server<sup>58</sup> calculated positions with diversifying selection using the default *p*-value  
253 threshold of 0.1.

254

## 255 **Results**

256 *Delta variant of concern detected in white-tailed deer in southern Québec.*

257 To discern the prevalence of SARS-CoV-2 in WTD in the region, 258 WTD were sampled in  
258 two areas from southern Québec, Canada between November 6–8 2021. The majority of the  
259 sampled WTD were adult (92%) and were male (79%). We collected 251 nasal swabs and 104  
260 RPLNs and tested for the presence of SARS-CoV-2 RNA by RT-PCR. Longitude and latitude  
261 data were obtained for 257 WTD.

262 Four nasal swabs were RT-PCR-positive, three of which were confirmed by the CFIA  
263 and thus reported to the World Organization for Animal Health (WOAH) as the first cases of  
264 SARS-CoV-2 identified in Canadian wildlife on December 1, 2021 (**Table S1**)<sup>59</sup>. Human RNase  
265 P was not detected in any of the positive nasal swabs, excluding contamination from human  
266 hosts. Of all nasal swabs, 1.6% (4/251; 95% CI 0.5–4.2%) were positive for SARS-CoV-2 RNA  
267 (**Table 1**); no RPLNs were positive. All positive deer were adults and three of the four were  
268 male. The four SARS-CoV-2-positive deer were harvested through licensed hunting activity in  
269 the high deer density region of Estrie (**Figure 1B**). No RPLNs were available from deer with  
270 SARS-CoV-2 positive nasal swabs.

271 Whole genome sequencing for SARS-CoV-2 conducted on three confirmed positive  
272 samples generated genome coverage of over 95% with equal to or greater than 10X coverage  
273 (mean depth from 1096.8 – 1894.8). On the fourth, higher cycle threshold (Ct) sample, 69.1%  
274 genome coverage with at least 10X coverage (mean depth of 116.5) was obtained (**Table 2**).

275 Sequences were assigned to lineage AY.44, a sublineage of B.1.617.2 (Delta), with Pangolin  
276 (0.96-0.99 ambiguity score), while one sample could not be confidently assigned to a Pangolin  
277 lineage due to the large number of N bases (31%) in the consensus sequence. Phylogenetic  
278 analysis revealed that all sequenced samples clustered together and shared a most recent  
279 common ancestor with SARS-CoV-2 sequences from humans in Vermont, USA between 2021-  
280 10-14 and 2021-10-27 (**Figure 2**).

281

### 282 *Mutations in the S gene and ORF8 detected in deer derived SARS-CoV-2 sequences*

283 Mutations were observed in the four positive WTD samples (**Table 3**). Notably, two S gene  
284 mutations were observed in the WTD sequences: S:T22I in three samples; S:A27V in one sample  
285 only. The S:T22I mutation was observed in only one closely related AY.44 sequence from a  
286 human from Quebec while S:A27V was not observed in closely related AY.44 sequences from  
287 GISAID. The S:T22I mutation has been observed in 16,628 GISAID sequences as of 2023-04-  
288 17 from a multitude of lineages. The S:A27V mutation has been observed in 5,889 GISAID  
289 sequences as of 2023-04-17. The S:G142D mutation, which is present in 64% of AY.44  
290 sequences in GISAID (171,978/267,019 sequences as of 2023-04-17), is present in two samples  
291 as a minor variant (57% and 53% allele fraction, respectively). The S:G142D mutation is  
292 prevalent in many Delta sublineage sequences and present in 10,655,444 GISAID sequences as  
293 of 2023-04-17. Interestingly, the S:G1085R mutation, which is present in all four sequenced  
294 samples and related AY.44 sequences, is only present in 0.1% (279/267,019) in lineage AY.44  
295 and has been identified in 2,574 GISAID sequences as of 2023-04-17.

296 An inframe deletion leading to a stop codon in the ORF8 was observed at S67/K68  
297 (TCTA to T deletion at nucleotide position 28,092) in sample 4205. Additionally, an ORF8  
298 inframe deletion of 6 amino acids at positions 61–66 and L60F mutation were observed in  
299 sample 4205 although with an allele fraction of 59% (262/442 observations of  
300 TGTGCGTGGATGAGGCTGG to T at nucleotide position 28,072).

301 As most of the minor alleles were found in sample 4249, it is worth noting that this  
302 sample had 15 ambiguous genomic positions with otherwise high completeness (99.1%) and  
303 median coverage (1879X). This suggests that more than one SARS-CoV-2 genotype is present  
304 within the sequenced sample. This is attributable to either contamination or a mixed infection in  
305 the host. Demixing using Freyja v1.3 (<https://github.com/andersen-lab/Freyja>) revealed the  
306 sample was 99.4% AY.44 and 0.1% AY.98. However, no other samples in the same sequencing  
307 run contained the 4249-specific variants or were assigned to the AY.98 lineage making  
308 contamination less likely. Inter-run contamination is unlikely as a new flow cell was used for  
309 each sequencing run and four different, alternating sets of 96 UD Indices were used to barcode  
310 the samples in the library pool to help mitigate index hopping. Moreover, all negative controls  
311 met quality control parameters, further suggesting contamination is unlikely. As AY.98 is closely  
312 related to AY.44 (differing by only 3 ORF1ab amino acid residues) and is inferred as low  
313 abundance, this suggests 4249 more likely represents a real mixed infection of two closely  
314 related AY.44 genomes.

315

### 316 *Virus isolation*

317 Two of the SARS-CoV-2-positive nasal swabs yielded viable virus when cultured in Vero E6  
318 (**Figure S2**). Resultant sequences from the isolates were comparable to their original nasal swab  
319 counterparts; identical mutations found in the original nasal swab sample sequences were also  
320 identified in the sequences from the isolates. Differences between sequences from the original

321 samples and the isolated sequences were observed. Changes noted in 4055 after a single passage  
322 included S:R683W and an ORF3a deletion V256-259. Five low coverage variants were lost in  
323 4249, which may suggest selection for the more abundant genotype.

324

### 325 *Deer nasal community profile an indicator of COVID-19 infection*

326 The WTD nasal swabs were sequenced by RNAseq, allowing for the taxonomic profiling of the  
327 nasal community with Kraken 2 and Bracken (**Table S2**). SARS-CoV-2 was detected in the  
328 reads from deer samples that tested positive for SARS-CoV-2 (4055 and 4249) (**Figure S3A**),  
329 confirming the RT-PCR results. All swabs were collected and stored in media containing  
330 antibiotics and antifungals prior to analysis, which could impact bacterial and fungal profiles.  
331 However, the SARS-CoV-2 positive samples cluster together even when excluding SARS-CoV-  
332 2 data. Additionally, the RT-PCR-negative deer samples 4192 and 3719 have a divergent  
333 microbial profile compared to other negative samples; most notably relative increases in  
334 *Cutibacterium acnes* compared to the other deer nasopharyngeal swabs (**Figure S3A**).

335

### 336 *SARS-CoV-2 infection elicits anti-viral, pro- and anti-inflammatory transcriptional response in* 337 *white-tailed deer*

338 We employed unbiased exploratory transcriptomic analysis to provide insights on WTD host  
339 response to SARS-CoV-2 infection. When considering the entire gene expression profile, the  
340 deer samples that tested positive for SARS-CoV-2 (4055 and 4249) clustered apart from the  
341 negative samples (**Figure S3B**). The negative samples further clustered into two groups, with  
342 samples 4192 and 3719 clustering away from the rest (**Figure S3B**). This difference is likely not  
343 due to age, sex, or hunting zone since these factors are not unique to the two aforementioned  
344 negative samples.

345 Differential expression analysis identified 316 significant DEGs (adjusted  $p < 0.05$ ,  $> 1$ -  
346 fold change), spanning 194 upregulated DEGs and 122 downregulated DEGs (**Figure 3A and B**  
347 and **Table S3**). Top expressed genes included *LOC110149600* (an inferred ortholog of human  
348 *IFITM1*), *LOC110149612* (inferred *IFITM1*), *OAS2*, *HSH2D*, and *APOBEC3H* (**Table 4** and  
349 **Figure 3B**). Notably, several significant DEGs appear to have duplications of human immune  
350 genes, including *IFITM1*, *IFI27L2A*, *C4a*, *HNRNP1*, and *XAF1*, with intriguing implications  
351 for the deer immune response. Upon narrowing down to SARS-CoV-2 viral attachment and entry  
352 factors that have been identified as important for human COVID-19 infection (e.g., *ACE2* and  
353 *TMPRSS2*), only *SIGLEC1* was significantly upregulated in the deer samples (**Figure S4**).

354 DEG function enrichment analysis using DAVID (**Tables S3-S6**) revealed a change in  
355 the expression of key host factors mediating innate immune response (interferon [IFN]  
356 signalling, inflammasome, APOBECs), pathology (ciliary function and apoptosis), and  
357 permissivity (receptors, attachment, and entry factors) in RT-PCR-positive vs. RT-PCR-negative  
358 deer. Significantly enriched Gene Ontology terms among up-regulated DEGs included defence  
359 response to virus, apoptotic process, innate immune response, inflammatory response, and  
360 chemotaxis, while down-regulated DEGs were involved in microtubule-based movement,  
361 axonemal dynein complex assembly, and ATP binding (**Figure 3C**). In humans and mice, the  
362 up-regulated DEGs are known to play important roles in type I and type III IFN signalling (e.g.,  
363 *IRF3*, *IRF4*, *IRF5*, *IRF7*, *IRF9*, *INF $\lambda$ 3*, *STAT2*, *IFITM1*, *IFITM2*, *IFITM3*, *IFI6*, *IFI27L2A*),  
364 complement activation (e.g., *C2*, *C4a*), nucleic acid detection (e.g., *DHX58*), immune cell  
365 recruitment (e.g., *CSF1*, *CCR1*, *CXCR2*, *RIPOR2*), apoptosis (e.g., *ELMO*, *BID*, *XAF1*,  
366 *DNASE1L3*), and host defence (e.g., *BST2*, *ZBP1*, *OAS2*, *ADAR*). Orthologous DEGs that were



367 downregulated are associated with microtubules (e.g., *DYNC2H1*, *DYNLRB2*, *DNAH3/5/7*) that  
368 make up extracellular structures such as cilia, likely reflecting host epithelial damage.

369

### 370 *White-tailed deer compared to human SARS-CoV-2 infection response*

371 To identify potential differences in SARS-CoV-2 host responses between humans and  
372 deer, we compared the log<sub>2</sub> fold change of SARS-CoV-2 positive samples to negative samples  
373 from human and WTD nasopharyngeal swabs (**Figure 4A** and **Table S8**). The human cohort  
374 contained 50 SARS-CoV-2 positive patients (divided into differing levels of disease severity  
375 with 18 ICU, 16 non-ICU, and 16 outpatient) and 13 SARS-CoV-2 negative individuals<sup>53</sup>. When  
376 examining all genes associated with innate immune response, there is a weak but statistically  
377 significant correlation between deer and human nasopharyngeal log<sub>2</sub> fold change ( $r = 0.27$ ,  $p$ -  
378 value =  $9.49 \times 10^{-13}$ ), with a slightly higher correlation observed when comparing against only  
379 outpatients ( $r = 0.35$ ,  $p$ -value =  $1.45 \times 10^{-20}$ ). For this analysis we only focused on the ~81% of  
380 deer genes with detected human orthologs and did not include deer-specific DEGs. We identified  
381 several immune-related genes that were significantly up-regulated in deer and not in the human  
382 clinical cohort, including *IFNL1*, *BST2*, and *IFITM1* (**Figure 4B**). In the data from the Butler et  
383 al., (2021) human clinical cohort (RNAseq of naso/oropharyngeal swabs collected from 669  
384 patients), some of these genes are significantly differentially expressed in SARS-CoV-2 positive  
385 versus negative patients, but still have low log<sub>2</sub> fold changes when compared to deer (0.84, 1.93,  
386 and 1.94 respectively), although the expression levels of these genes generally increases when  
387 comparing patients with higher viral loads than those with none<sup>60</sup>. Key viral entry and  
388 attachment factors for human COVID-19 infection were also examined in this way (**Figure S5**),  
389 with five of the set (*ACE2*, *BSG*, *CTSV*, *MMP2*, and *SIGLEC1*) being significant DEGs in the  
390 human nasopharyngeal samples compared to only one (*SIGLEC1*) in the deer samples.

391 Orthology analysis between human and the *texanus* subspecies of WTD revealed two  
392 interferon induced transmembrane 1 (*IFITM1*) genes in WTD, compared to a single copy in  
393 humans. Both of these genes were significantly over-expressed in WTD with SARS-CoV-2  
394 infections (log<sub>2</sub> fold change of 4.84 and 5.42 with adjusted  $p$ -values of  $2.82 \times 10^{-8}$  and  $1.53 \times 10^{-13}$   
395 for *LOC110149600* and *LOC110149612*, respectively). However, in the human cohort, *IFITM1*  
396 was not significantly differentially expressed, and log<sub>2</sub> fold change values were low. Other WTD  
397 genomes (strains 20LAN1187 and brownington 1) were also confirmed to have two *IFITM1*  
398 genes, with 99% similarity between the sequenced *LOC110149600* genes (2-4 nucleotide  
399 differences) and 99% similarity between the *LOC110149612* genes (6-12 nucleotide  
400 differences). *LOC110149600* and *LOC110149612* are separated on the genome, with an average  
401 distance of 26,485 +/- 486 base pairs apart. The *LOC110149612* transcript has an extended N-  
402 terminus compared to *LOC110149600* but with respect to their protein sequences, there are only  
403 three amino acid substitutions between them: valine/methionine (position 10),  
404 leucine/methionine (position 11), and valine/methionine (position 20) for *LOC110149612* and  
405 *LOC110149600*, respectively. Near identical *IFITM1* sequences are also found in the other two  
406 WTD genomes. The identity between the human and WTD *IFITM1* proteins is much lower at  
407 66-68%, with particular differences in the N-terminus including several unique proline  
408 substitutions that could impact protein structure. A Fixed Effects Likelihood analysis identified  
409 positions 20, 113, and 115 to have evidence of diversifying selection (**Table S9**), with all three  
410 of these positions differing between humans and WTD. A phylogenetic tree based on *IFITM1*  
411 proteins from boreoeutherian mammals shows multiple instances of *IFITM1* gene duplication, all

412 showing the extensive diversification *IFITM1* has undergone throughout mammals and the  
413 substantial differences between human and WTD *IFITM1*.

414

## 415 Discussion

416 In this report, we detected SARS-CoV-2 in 1.6% (95% CI 0.5–4.2%) of nasal swabs from  
417 sampled deer in the Estrie region of southern Québec; viral sequences were assigned to lineage  
418 AY.44, a sublineage of the Delta variant of concern (VOC). Delta was the predominant  
419 circulating VOC at the time these animals were sampled, which is suggestive of a more recent  
420 spillover event. However, several unique mutations observed in the WTD sequences were not  
421 observed in the closely related AY.44 sequences from GISAID, supporting sustained deer-deer  
422 transmission. The WTD derived sequences from this study were most closely related to SARS-  
423 CoV-2 sequences from humans in neighbouring Vermont, USA and one sequence from a human  
424 in Québec (**Figure 2**). Although we included SARS-CoV-2 sequences from humans from  
425 Québec in the analysis, it is unknown if any of these sequences were from the Estrie region.  
426 While the Estrie region borders Vermont, to our knowledge, there is no evidence of SARS-CoV-  
427 2 in WTD that has been reported in Vermont to date <sup>61</sup>.

428 Whole SARS-CoV-2 genome sequences were found to contain two S gene mutations  
429 (S:T22I and S:A27V) that were different between deer SARS-CoV-2 and the most closely  
430 related AY.44 sequences from GISAID. These changes are both located in the N terminal  
431 domain (NTD) of S1, which harbours antigenic and glycan-binding sites, and may interact with  
432 auxiliary receptors <sup>62</sup>. Changes at amino acid position 22 and 27 have been noted early in the  
433 pandemic, with up to four different amino acid variants at position 27; this plasticity is  
434 suggestive of an adaptive evolutionary role <sup>63,64</sup>. We have since detected the S:T22I mutation in a  
435 highly divergent, deer-adapted SARS-CoV-2 from Ontario <sup>10</sup>, further supporting a relevant role  
436 for changes in this region of the S protein. Additionally, in one deer (4205), two inframe  
437 deletions in ORF8 were observed. The ORF8 gene is hypervariable and encodes for a non-  
438 essential accessory protein and has been shown to downregulate the major histocompatibility  
439 complex class I through autophagic degradation, thus impairing cytotoxic T cell responses  
440 during SARS-CoV-2, but not SARS-CoV infection <sup>65</sup>. It may also contribute to immune evasion  
441 through interferon antagonism <sup>66,67</sup>. More recently, ORF8 protein was found to purportedly  
442 mimic host interleukin-17 that contributes to severe inflammation in COVID-19 <sup>68</sup>. Truncation of  
443 ORF8 arising from nonsense mutations and deletions have been previously observed in both  
444 human and animal derived sarbecoviruses (SARS-CoV and SARS-CoV-2) <sup>66,69–71</sup> and may be  
445 associated with milder disease through enhanced T cell functions. This underscores the potential  
446 role of ORF8 in SARS-CoV-2 adaptation.

447 All RT-PCR-positive WTD were identified in the Estrie region (**Table 1; Figure 1**). This  
448 is unsurprising given the reported spatial clustering of SARS-CoV-2 in WTD in other regions  
449 <sup>1,5,6</sup>. While it is presently unclear how the deer acquired SARS-CoV-2 infection, there are several  
450 notable differences between the sampled regions that may contribute to the spatial heterogeneity  
451 of infection: 1) WTD population density and hunter harvest are greater in Estrie (13-15  
452 deer/km<sup>2</sup>) compared to the Laurentides (~1 deer/km<sup>2</sup>) (MELCCFP, unpublished data), 2) the  
453 sampled regions in Estrie have higher human population density compared to sampled regions in  
454 the Laurentides (**Figure 1A**), and 3) COVID-19 positivity in humans was greater in Estrie  
455 (4.2%) during the study period compared to the Laurentides (2.3%) <sup>72</sup>. More longitudinal  
456 surveillance of SARS-CoV-2 in WTD is needed to understand the epidemiology of the virus in  
457 this species and how it relates to WTD ecology and transmission dynamics in sympatric humans.

458 These are important considerations for understanding the potential role of WTD as a  
459 maintenance population or reservoir for SARS-CoV-2.

460 Based on previous experimental work, productive viral replication is limited to the upper  
461 respiratory tract with shedding of infectious virus in nasal secretions of infected WTD<sup>3,9</sup>. We  
462 successfully isolated viable SARS-CoV-2 from two RT-PCR-positive nasal swabs indicating  
463 infectivity. This suggests there is a potential risk of contact with infectious SARS-CoV-2 from  
464 deer, including when handling and processing WTD carcasses<sup>1</sup>. Notably, there is only one report  
465 of an isolated, unsustainable deer-to-human transmission event to date<sup>10</sup>. These findings warrant  
466 increased awareness of the risks associated with human contact with free-living and captive  
467 WTD<sup>73</sup>.

468 Previous work characterizing the WTD host response to SARS-CoV-2 infection is  
469 limited. Davila and colleagues conducted a comparative transcriptomics analysis of SARS-CoV-  
470 2 infected human and deer primary respiratory epithelial cells from the trachea, finding evidence  
471 of divergent early innate immune response<sup>74</sup>. The present study is the first to explore the host  
472 response in WTD naturally infected with SARS-CoV-2. Host expression patterns in SARS-CoV-  
473 2 infected WTD were associated with the innate immune response, including signalling  
474 pathways related to anti-viral and pro-inflammatory signalling and host damage. There was  
475 evidence for type I and III IFN responses (e.g., *IRF3*, *IRF4*, *IRF5*, *IRF7*, *IRF9*, *INFλ3*, *STAT2*,  
476 *IFITM1*, *IFITM2*, *IFITM3*, *IFI6*, *IFI27L2A*). The type I IFN response is an important aspect of  
477 rapidly controlling viral infection, but dysregulation is associated with severe illness and  
478 pathology. Type III IFNs are considered to produce a more localized response to infection in  
479 comparison to the systemic inflammatory response often induced by type I IFN; type III IFNs  
480 result in prolonged expression of ISGs<sup>75</sup>. Upregulation of pro-inflammatory antagonists were  
481 also observed. For example, there was increased expression of two NF-KB inhibitors (e.g.  
482 *NFKBID*, *NFKBIZ*) which could indicate a mechanism to reduce deleterious inflammation or  
483 indicate a switch to resolution of inflammation phase (e.g., tissue repair)<sup>76</sup>. Additionally, several  
484 genes involved in antiviral response and inflammation homeostasis were found to have multiple  
485 DEG copies (e.g., *IFITM1*, *XAF1*) which may also contribute to protecting the host from  
486 inflammation<sup>77,78</sup>.

487 When examining all genes associated with innate immune response, there is a weak but  
488 statistically significant correlation between deer and human log<sub>2</sub> fold change, with the strongest  
489 correlation observed between deer and outpatients. Previous studies have reported that WTD  
490 infected with SARS-CoV-2 do not present with overt signs of infection or pathology; only minor  
491 pathological changes associated with rhinitis and marked attenuation of the respiratory  
492 epithelium have been observed in experimentally infected WTD<sup>3,7,9</sup>. However, duration of  
493 infection for each individual host is unknown, limiting the inferences that can be made regarding  
494 the dynamics of innate immune responses. Additionally, it is unclear whether infection with  
495 SARS-CoV-2 results in any sublethal effects (e.g., condition, winter survival, reproduction)  
496 despite no overt signs of infection.

497 There were also DEGs with substantial differences within the innate immune response  
498 gene set, notably *MARCO*, *IFNL1*, *IFITM1*, *IFITM3*, *RSAD2*, *BST2*, *APOBEC3H*, *LRP8*, and  
499 *BPIFA1*. These genes had a large difference (>2.5) in log<sub>2</sub> fold change values between the  
500 human and deer DEGs while also being significantly differentially expressed in deer. These data  
501 indicate that the deer nasal epithelium expressed genes that encode antiviral proteins, including  
502 the *IFITM* family, in response to SARS-CoV-2 infection. *IFITMs* are membrane proteins that  
503 restrict viral entry for a broad spectrum of enveloped viruses<sup>79,80</sup>. In contrast, SARS-CoV-2 has

504 been shown to hijack IFITMs for efficient cellular entry, a process mediated by specific  
505 interactions between the N-terminal region of IFITMs and the viral S protein<sup>78,80</sup>. *IFITM1* is an  
506 intriguing case as it has undergone a lineage-specific duplication resulting in two copies in deer,  
507 both of which were significantly upregulated in this study. The amino acid changes between the  
508 two WTD *IFITM1* are present in other mammalian (e.g. other deer in the *Cervus* genus and  
509 Felinae) lineages and are thus not unique to WTD deer, but do appear to have evolved  
510 independently on several occasions. More importantly, the N- and C-terminal ends of both  
511 *IFITM1* possess unique differences in deer compared to human *IFITM1*. We speculate that these  
512 differences might modulate differences in antiviral properties or efficiency of *IFITM1* in deer  
513 (and other animals) versus humans, as previously seen in the *IFITM3* family in primates<sup>81</sup>, and  
514 are an important future target for characterization of the SARS-CoV-2 infection response in  
515 WTD.

516 There are several limitations for this study that should be considered. First, while  
517 leveraging the regular WTD hunting season resulted in a large number of samples, the present  
518 work was conducted over a short time period and a relatively small geographic region.  
519 Therefore, our study represents a snapshot in time and space. Future work should aim to obtain  
520 longitudinal data to investigate maintenance of SARS-CoV-2 in Québec WTD populations and  
521 assess for spatiotemporal patterns in pathogen ecology. Second, samples analyzed in this study  
522 were derived from harvested deer and were therefore collected post-mortem. Although 98% of  
523 samples were collected within 48 hours of harvest, it is possible that inhibitors or sample  
524 degradation occurred between harvest and sample collection. Lastly, our study only focuses on  
525 free-ranging WTD populations and we therefore cannot make inferences about SARS-CoV-2 in  
526 captive conspecifics.

527 Surveillance for SARS-CoV-2 in wildlife is ongoing across Canada. Our findings  
528 underscore that longitudinal surveillance efforts in WTD in Québec and across Canada are  
529 warranted. We provide preliminary insights into unique transcriptional responses in white-tailed  
530 deer with SARS-CoV-2 infection. Further work is needed to understand how the virus is  
531 transmitted from humans to deer, how efficiently and sustainably the virus is transmitted among  
532 deer in a natural setting, and how viral adaptations occur in WTD. Additionally, more  
533 longitudinal epidemiological and ecological data is needed to better understand whether WTD  
534 truly represent a competent maintenance population or reservoir for SARS-CoV-2. Ongoing  
535 coordinated and cross-disciplinary efforts are required to ensure a One Health approach is  
536 applied to this critical pandemic challenge by informing evidence-based decision-making for  
537 human and animal health.

### 538 539 **Acknowledgements**

540 We thank the hunters for the deer submissions. Many thanks to the technicians and biologists  
541 who assisted with sample collection (Matthew Rokas-Bérubé, Yannicia Fréchette-Hudon,  
542 Catherine Greaves, Charles-Étienne Gagnon, Marylou Meyer, Camille Klein, Stéphane  
543 Lamoureux, Yannick Bilodeau, François Lebel, Sophie Plante, and Isabelle Laurion), and the  
544 technicians that assisted with sample analysis (Emily Chien, Mathieu Pinette, Winfield Yim,  
545 Melissa Goolia, and Nikki Toledo). We are grateful for the work of D. Bulir in developing the  
546 UTR gene target used in the Sunnybrook Research Institute RT-PCR analysis.  
547 This work was supported by the Public Health Agency of Canada, and Canadian Institutes of  
548 Health Research Operating Grant: Emerging COVID-19 Research Gaps and Priorities (466984).  
549 J.D.K. is supported by an AMMI Canada/BioMérieux Fellowship in Microbial Diagnostics.



550 Funding and computing resources for F.M were provided by the Shared Hospital Laboratory,  
551 Dalhousie University, and the Donald Hill Family. O.L. was supported by the Canadian Safety  
552 and Security Program, Laboratories Canada, and Canadian Food Inspection Agency (CFIA)  
553 Genomics Development and Research Initiative. A.B. also acknowledges support from Natural  
554 Sciences and Engineering Research Council of Canada (NSERC), Canadian Institutes of Health  
555 Research (CIHR), and Coronavirus Variants Rapid Response Network (CoVaRR-Net). VIDO  
556 receives operational funding for its CL3 facility (InterVac) from the Canada Foundation for  
557 Innovation through the Major Science Initiatives. VIDO also receives operational funding from  
558 the Government of Saskatchewan through Innovation Saskatchewan and the Ministry of  
559 Agriculture.

560

#### 561 **Competing interests:**

562 The authors declare no conflicts relevant to this article.

563

#### 564 **Author contributions:**

565 Conceptualization: J.D.K., A.M., M.G., J.B., T.B., B.P., S.M.

566 Sample collection: J.D.K., A.M., M.G.

567 Laboratory analysis: J.D.K., P.A., J.B.S., H.Y.C., K.N., L.Y., L.R.L., B.P.

568 Data analysis/Investigation: J.D.K., B.L., P.K., F.M., O.L.

569 Writing – Original Draft: J.D.K., B.L.

570 Writing – Review & Editing: All authors

571 Visualization: J.D.K., B.L., P.K., A.C.D., O.L.

572 Supervision: L.R.L., A.C.D., O.L., B.P., S.M.

573 Funding acquisition: A.M., M.G., S.M.

574

#### 575 **Data availability:**

576 Sequence data from the three SARS-CoV-2 viruses from white-tailed deer sequenced in this  
577 study are deposited in GISAID (<https://www.gisaid.org/>) under Accession numbers

578 EPI\_ISL\_10169675 (hCoV-19/Canada/QC-WTD-qxic4205/2021), EPI\_ISL\_10170149 (hCoV-

579 19/Canada/QC-WTD-qxic4249/2021), and EPI\_ISL\_10168587 (hCoV-19/Canada/QC-WTD-

580 qxic4055/2021).

581

#### 582 **References:**

- 583 1. Caserta, L. C. *et al.* White-tailed deer (*Odocoileus virginianus*) may serve as a wildlife  
584 reservoir for nearly extinct SARS-CoV-2 variants of concern. *Proc. Natl. Acad. Sci.* **120**,  
585 e2215067120 (2023).
- 586 2. Chandler, J. C. *et al.* SARS-CoV-2 exposure in wild white-tailed deer (*Odocoileus*  
587 *virginianus*). *Proc. Natl. Acad. Sci.* **118**, (2021).
- 588 3. Cool, K. *et al.* Infection and transmission of ancestral SARS-CoV-2 and its alpha variant in  
589 pregnant white-tailed deer. *Emerg. Microbes Infect.* **0**, 1–39 (2021).
- 590 4. Hale, V. L. *et al.* SARS-CoV-2 infection in free-ranging white-tailed deer. *Nature* **602**, 481–  
591 486 (2022).
- 592 5. Kuchipudi, S. V. *et al.* Multiple spillovers from humans and onward transmission of SARS-  
593 CoV-2 in white-tailed deer. *Proc. Natl. Acad. Sci.* **119**, (2022).
- 594 6. Marques, A. D. *et al.* Multiple Introductions of SARS-CoV-2 Alpha and Delta Variants into  
595 White-Tailed Deer in Pennsylvania. *mBio* **13**, e02101-22 (2022).

- 596 7. Martins, M. *et al.* From Deer-to-deer: SARS-CoV-2 is efficiently transmitted and presents  
597 broad tissue tropism and replication sites in white-tailed deer. *PLOS Pathog.* **18**, e1010197  
598 (2022).
- 599 8. Palermo, P. M., Orbegozo, J., Watts, D. M. & Morrill, J. C. SARS-CoV-2 neutralizing  
600 antibodies in white-tailed deer from Texas. *Vector-Borne Zoonotic Dis.* **22**, 62–64 (2022).
- 601 9. Palmer, M. V. *et al.* Susceptibility of white-tailed deer (*Odocoileus virginianus*) to SARS-  
602 CoV-2. *J. Virol.* **95**, (2021).
- 603 10. Pickering, B. *et al.* Divergent SARS-CoV-2 variant emerges in white-tailed deer with deer-  
604 to-human transmission. *Nat. Microbiol.* **7**, 2011–2024 (2022).
- 605 11. Roundy, C. M. *et al.* High seroprevalence of SARS-CoV-2 in white-tailed deer (*Odocoileus*  
606 *virginianus*) at one of three captive cervid facilities in Texas. *Microbiol. Spectr.* **10**, e00576-  
607 22 (2022).
- 608 12. Tan, C. C. S. *et al.* Transmission of SARS-CoV-2 from humans to animals and potential host  
609 adaptation. *Nat. Commun.* **13**, 2988 (2022).
- 610 13. Bashor, L. *et al.* SARS-CoV-2 evolution in animals suggests mechanisms for rapid variant  
611 selection. *Proc. Natl. Acad. Sci.* **118**, e2105253118 (2021).
- 612 14. Larsen, H. D. *et al.* Preliminary report of an outbreak of SARS-CoV-2 in mink and mink  
613 farmers associated with community spread, Denmark, June to November 2020.  
614 *Eurosurveillance* **26**, 2100009 (2021).
- 615 15. Wei, C. *et al.* Evidence for a mouse origin of the SARS-CoV-2 Omicron variant. *J. Genet.*  
616 *Genomics* **48**, 1111-1121 (2021).
- 617 16. Banerjee, A. *et al.* Novel insights into immune systems of bats. *Front. Immunol.* **11**, 26  
618 (2020).
- 619 17. Hiller, M. *et al.* Reference-quality bat genomes illuminate adaptations to viral tolerance and  
620 disease resistance. Preprint at *Research Square* [https:// doi:10.21203/rs.3.rs-2557682/v1](https://doi.org/10.21203/rs.3.rs-2557682/v1)  
621 (2023).
- 622 18. Irving, A. T., Ahn, M., Goh, G., Anderson, D. E. & Wang, L.-F. Lessons from the host  
623 defences of bats, a unique viral reservoir. *Nature* **589**, 363–370 (2021).
- 624 19. Subudhi, S., Rapin, N. & Misra, V. Immune system modulation and viral persistence in bats:  
625 understanding viral spillover. *Viruses* **11**, 192 (2019).
- 626 20. Becker, D. J. & Banerjee, A. Coupling field and laboratory studies of immunity and infection  
627 in zoonotic hosts. *Lancet Microbe* **4**, E285-E287 (2023).
- 628 21. Mandl, J. N. *et al.* Reservoir host immune responses to emerging zoonotic viruses. *Cell* **160**,  
629 20–35 (2015).
- 630 22. Gagnier, M., Laurion, I. & DeNicola, A. J. Control and surveillance operations to prevent  
631 chronic wasting disease establishment in free-ranging white-tailed deer in Québec, Canada.  
632 *Animals* **10**, 283 (2020).
- 633 23. LeBlanc, J. J. *et al.* Real-time PCR-based SARS-CoV-2 detection in Canadian laboratories.  
634 *J. Clin. Virol.* **128**, 104433 (2020).
- 635 24. Lu, X. *et al.* US CDC Real-Time Reverse Transcription PCR panel for detection of severe  
636 acute respiratory syndrome coronavirus 2. *Emerg. Infect. Dis.* **26**, 1654–1665 (2020).
- 637 25. World Organization for Animal Health. Considerations for sampling, testing, and reporting  
638 of SARS-CoV-2 in animals. [cited 2023 May 5]. [https://www.oie.int/app/uploads/2021/03/a-](https://www.oie.int/app/uploads/2021/03/a-sampling-testing-and-reporting-of-sars-cov-2-in-animals-3-july-2020.pdf)  
639 [sampling-testing-and-reporting-of-sars-cov-2-in-animals-3-july-2020.pdf](https://www.oie.int/app/uploads/2021/03/a-sampling-testing-and-reporting-of-sars-cov-2-in-animals-3-july-2020.pdf). (2020).
- 640 26. Agresti, A. & Coull, B. A. Approximate is better than “exact” for interval estimation of  
641 binomial proportions. *Am. Stat.* **52**, 119–126 (1998).

- 642 27. Statistics Canada. Population and dwelling count highlight tables, 2016 Census [cited 2021  
643 Dec 07]. [https://www12.statcan.gc.ca/census-recensement/2016/dp-pd/hltfst/pd-](https://www12.statcan.gc.ca/census-recensement/2016/dp-pd/hltfst/pd-pl/Table.cfm?Lang=Eng&T=101&S=50&O=A#2016A000224)  
644 [pl/Table.cfm?Lang=Eng&T=101&S=50&O=A#2016A000224](https://www12.statcan.gc.ca/census-recensement/2016/dp-pd/hltfst/pd-pl/Table.cfm?Lang=Eng&T=101&S=50&O=A#2016A000224)
- 645 28. Ministère des Forêts, de la Faune et des Parcs (MFFP). Season 2020 - White-tailed deer  
646 harvest per hunting zone. 4 (2020).
- 647 29. Di Tommaso, P. *et al.* Nextflow enables reproducible computational workflows. *Nat.*  
648 *Biotechnol.* **35**, 316–319 (2017).
- 649 30. Ewels, P. A. *et al.* The nf-core framework for community-curated bioinformatics pipelines.  
650 *Nat. Biotechnol.* **38**, 276–278 (2020).
- 651 31. Patel, H. *et al.* nf-core/viralrecon: nf-core/viralrecon v2.5 - Manganese Monkey. *Zenodo*  
652 [https://doi:10.5281/ZENODO.3901628](https://doi.org/10.5281/ZENODO.3901628) (2022)
- 653 32. Elbe, S. & Buckland-Merrett, G. Data, disease and diplomacy: GISAID’s innovative  
654 contribution to global health. *Glob. Chall.* **1**, 33–46 (2017).
- 655 33. Khare, S. *et al.* GISAID’s role in pandemic response. *China CDC Wkly.* **3**, 1049–1051  
656 (2021).
- 657 34. Shu, Y. & McCauley, J. GISAID: Global initiative on sharing all influenza data – from  
658 vision to reality. *Eurosurveillance* **22**, 30494 (2017).
- 659 35. Turakhia, Y. *et al.* Ultrafast Sample placement on Existing tRees (USHER) enables real-time  
660 phylogenetics for the SARS-CoV-2 pandemic. *Nat. Genet.* **53**, 809–816 (2021).
- 661 36. Aksamentov, I., Roemer, C., Hodcroft, E. & Neher, R. Nextclade: clade assignment,  
662 mutation calling and quality control for viral genomes. *J. Open Source Softw.* **6**, 3773  
663 (2021).
- 664 37. Nguyen, L.-T., Schmidt, H. A., von Haeseler, A. & Minh, B. Q. IQ-TREE: A fast and  
665 effective stochastic algorithm for estimating maximum-likelihood phylogenies. *Mol. Biol.*  
666 *Evol.* **32**, 268–274 (2015).
- 667 38. Minh, B. Q. *et al.* IQ-TREE 2: New models and efficient methods for phylogenetic inference  
668 in the genomic era. *Mol. Biol. Evol.* **37**, 1530–1534 (2020).
- 669 39. Kalyaanamoorthy, S., Minh, B. Q., Wong, T. K. F., von Haeseler, A. & Jermini, L. S.  
670 ModelFinder: fast model selection for accurate phylogenetic estimates. *Nat. Methods* **14**,  
671 587–589 (2017).
- 672 40. Cock, P. J. A. *et al.* Biopython: freely available Python tools for computational molecular  
673 biology and bioinformatics. *Bioinforma. Oxf. Engl.* **25**, 1422–1423 (2009).
- 674 41. Yu, G., Smith, D. K., Zhu, H., Guan, Y. & Lam, T. T.-Y. ggtree: an r package for  
675 visualization and annotation of phylogenetic trees with their covariates and other associated  
676 data. *Methods Ecol. Evol.* **8**, 28–36 (2017).
- 677 42. Nasir, J. A. *et al.* A comparison of whole genome sequencing of SARS-CoV-2 using  
678 amplicon-based sequencing, random hexamers, and bait capture. *Viruses* **12**, 895 (2020).
- 679 43. Chen, S., Zhou, Y., Chen, Y. & Gu, J. fastp: an ultra-fast all-in-one FASTQ preprocessor.  
680 *Bioinforma. Oxf. Engl.* **34**, i884–i890 (2018).
- 681 44. Dobin, A. *et al.* STAR: ultrafast universal RNA-seq aligner. *Bioinforma. Oxf. Engl.* **29**, 15–  
682 21 (2013).
- 683 45. O’Hara, E. *et al.* Neural transcriptomic signature of chronic wasting disease in white-tailed  
684 deer. *BMC Genomics* **23**, 69 (2022).
- 685 46. Bushnell, B. *BBMap: A Fast, Accurate, Splice-Aware Aligner.*  
686 <https://www.osti.gov/biblio/1241166> (2014).

- 687 47. Wood, D. E., Lu, J. & Langmead, B. Improved metagenomic analysis with Kraken 2.  
688 *Genome Biol.* **20**, 257 (2019).
- 689 48. Lu, J., Breitwieser, F. P., Thielen, P. & Salzberg, S. L. Bracken: estimating species  
690 abundance in metagenomics data. *PeerJ Comput. Sci.* **3**, e104 (2017).
- 691 49. Patro, R., Duggal, G., Love, M. I., Irizarry, R. A. & Kingsford, C. Salmon provides fast and  
692 bias-aware quantification of transcript expression. *Nat. Methods* **14**, 417–419 (2017).
- 693 50. Love, M. I., Huber, W. & Anders, S. Moderated estimation of fold change and dispersion for  
694 RNA-seq data with DESeq2. *Genome Biol.* **15**, 550 (2014).
- 695 51. Sherman, B. T. *et al.* DAVID: a web server for functional enrichment analysis and functional  
696 annotation of gene lists (2021 update). *Nucleic Acids Res.* **50**, W216–221 (2022).
- 697 52. Emms, D. M. & Kelly, S. OrthoFinder: phylogenetic orthology inference for comparative  
698 genomics. *Genome Biol.* **20**, 238 (2019).
- 699 53. Luc, J. *et al.* Comparative transcriptomic analysis of nasopharyngeal swabs from individuals  
700 with and without COVID-19. *Figshare* <https://doi.org/10.6084/M9.FIGSHARE.22704403.V1>.  
701 (2023)
- 702 54. Liberzon, A. *et al.* The Molecular Signatures Database (MSigDB) hallmark gene set  
703 collection. *Cell Syst.* **1**, 417–425 (2015).
- 704 55. Edgar, R. C. MUSCLE: multiple sequence alignment with high accuracy and high  
705 throughput. *Nucleic Acids Res.* **32**, 1792–1797 (2004).
- 706 56. Stamatakis, A. RAxML version 8: a tool for phylogenetic analysis and post-analysis of large  
707 phylogenies. *Bioinformatics* **30**, 1312–1313 (2014).
- 708 57. Kosakovsky Pond, S. L. & Frost, S. D. W. Not so different after all: a comparison of  
709 methods for detecting amino acid sites under selection. *Mol. Biol. Evol.* **22**, 1208–1222  
710 (2005).
- 711 58. Weaver, S. *et al.* Datamonkey 2.0: A modern web application for characterizing selective  
712 and other evolutionary processes. *Mol. Biol. Evol.* **35**, 773–777 (2018).
- 713 59. World Organization for Animal Health. SARS-CoV-2 in animals – situation report 8. [cited  
714 2023 May 5]. <https://www.oie.int/app/uploads/2022/01/sars-cov-2-situation-report-8.pdf>.  
715 (2021).
- 716 60. Butler, D. *et al.* Shotgun transcriptome, spatial omics, and isothermal profiling of SARS-  
717 CoV-2 infection reveals unique host responses, viral diversification, and drug interactions.  
718 *Nat. Commun.* **12**, 1660 (2021).
- 719 61. Despres, H. W. *et al.* Surveillance of Vermont wildlife in 2021-2022 reveals no detected  
720 SARS-CoV-2 viral RNA. 2023.04.25.538264 Preprint at *bioRxiv*  
721 <https://doi.org/10.1101/2023.04.25.538264> (2023).
- 722 62. Harvey, W. T. *et al.* SARS-CoV-2 variants, spike mutations and immune escape. *Nat. Rev.*  
723 *Microbiol.* **19**, 409–424 (2021).
- 724 63. Long, S. W. *et al.* Molecular Architecture of Early Dissemination and Massive Second Wave  
725 of the SARS-CoV-2 Virus in a Major Metropolitan Area. *mBio* **11**, e02707-20 (2020).
- 726 64. Saputri, D. S. *et al.* Flexible, Functional, and Familiar: Characteristics of SARS-CoV-2  
727 Spike Protein Evolution. *Front. Microbiol.* **11**, (2020).
- 728 65. Zhang, Y. *et al.* The ORF8 protein of SARS-CoV-2 mediates immune evasion through  
729 down-regulating MHC-I. *Proc. Natl. Acad. Sci.* **118**, e2024202118 (2021).
- 730 66. Li, J.-Y. *et al.* The ORF6, ORF8 and nucleocapsid proteins of SARS-CoV-2 inhibit type I  
731 interferon signaling pathway. *Virus Res.* **286**, 198074 (2020).



- 732 67. Moriyama, M., Lucas, C., Monteiro, V. S. & Iwasaki, A. SARS-CoV-2 variants do not  
733 evolve to promote further escape from MHC-I recognition. Preprint at *bioRxiv*  
734 <http://biorxiv.org/lookup/doi/10.1101/2022.05.04.490614> (2022).
- 735 68. Wu, X. *et al.* Viral mimicry of interleukin-17A by SARS-CoV-2 ORF8. *mBio* **13**, e00402-22  
736 (2022).
- 737 69. Fong, S.-W. *et al.* Robust Virus-specific adaptive immunity in COVID-19 patients with  
738 SARS-CoV-2  $\Delta$ 382 variant infection. *J. Clin. Immunol.* **42**, 214–229 (2022).
- 739 70. Su, Y. C. F. *et al.* Discovery and genomic characterization of a 382-nucleotide deletion in  
740 ORF7b and ORF8 during the early evolution of SARS-CoV-2. *mBio* **11**, e01610-20 (2020).
- 741 71. Young, B. E. *et al.* Effects of a major deletion in the SARS-CoV-2 genome on the severity of  
742 infection and the inflammatory response: an observational cohort study. *The Lancet* **396**,  
743 603–611 (2020).
- 744 72. Institut national de & sant  publique du Qu bec (INSPQ). Donn es COVID-19 par r gion  
745 sociosanitaire [cited 2023 May 5]. <https://www.inspq.qc.ca/covid-19/donnees/par-region>
- 746 73. Public Health Agency of Canada. Animals and COVID-19. [cited 2023 May 5].  
747 [https://www.canada.ca/en/public-health/services/diseases/2019-novel-coronavirus-](https://www.canada.ca/en/public-health/services/diseases/2019-novel-coronavirus-infection/prevention-risks/animals-covid-19.html)  
748 [infection/prevention-risks/animals-covid-19.html](https://www.canada.ca/en/public-health/services/diseases/2019-novel-coronavirus-infection/prevention-risks/animals-covid-19.html)
- 749 74. Davila, K. M. S. *et al.* How do deer respiratory epithelial cells weather the initial storm of  
750 SARS-CoV-2? Preprint at *bioRxiv* <https://doi.org/10.1101/2023.04.24.538130> (2023).
- 751 75. Broadbent, L. *et al.* An endogenously activated antiviral state restricts SARS-CoV-2  
752 infection in differentiated primary airway epithelial cells. *PLOS ONE* **17**, e0266412 (2022).
- 753 76. Lieberman, N. A. P. *et al.* In vivo antiviral host transcriptional response to SARS-CoV-2 by  
754 viral load, sex, and age. *PLOS Biol.* **18**, e3000849 (2020).
- 755 77. Han, Y. *et al.* XAF1 Protects host against emerging RNA viruses by stabilizing IRF1-  
756 dependent antiviral immunity. *J. Virol.* **96**, e0077422 (2022).
- 757 78. Shi, G. *et al.* Opposing activities of IFITM proteins in SARS-CoV-2 infection. *EMBO J.*  
758 **40**, e106501 (2021).
- 759 79. Buchrieser, J. *et al.* Syncytia formation by SARS-CoV-2-infected cells. *EMBO J.* **39**,  
760 e106267 (2020).
- 761 80. Prelli Bozzo, C. *et al.* IFITM proteins promote SARS-CoV-2 infection and are targets for  
762 virus inhibition in vitro. *Nat. Commun.* **12**, 4584 (2021).
- 763 81. Compton, A. A. *et al.* Natural mutations in IFITM3 modulate post-translational regulation  
764 and toggle antiviral specificity. *EMBO Rep.* **17**, 1657–1671 (2016).
- 765

766 **Tables:**

767 **Table 1.** Results from SARS-CoV-2 RT-PCR testing of nasal swabs and retropharyngeal lymph  
768 node tissue, and antibody testing of thoracic cavity fluid from white-tailed deer, in two sampling  
769 regions, southern Québec, Canada, November 6-8 2021\*

| Sampling area                                           | Nasal Swabs |                                         | Retropharyngeal Lymph Nodes |                                         |
|---------------------------------------------------------|-------------|-----------------------------------------|-----------------------------|-----------------------------------------|
|                                                         | No. Tested  | No. SARS-CoV-2 RNA Positive (%; 95% CI) | No. Tested                  | No. SARS-CoV-2 RNA Positive (%; 95% CI) |
| Dunham station, Estrie region, High deer density        | 150         | 4 (2.7; 0.8–6.9)                        | NA                          | NA                                      |
| Browsburg station, Laurentides region, Low deer density | 101         | 0 (0; 0–4.4)                            | 104                         | 0 (0; 0–4.3)                            |
| Total                                                   | 251         | 4 (1.6; 0.5–2.2)                        | 104                         | 0 (0; 0–4.3)                            |

\*

770 NA, not applicable.

771 **Table 2.** Read mapping statistics from nf-core/viralrecon analysis for four SARS-CoV-2 positive  
772 white-tailed deer nasal swab samples from southern Québec, Canada, November 6-8 2021

| Nasal Swab ID | Genome Coverage* (%) | Mean Coverage Depth | Total Reads | Mapped Reads | 0X positions | <10X positions | Virus name                          | GISAID Accession No.     |
|---------------|----------------------|---------------------|-------------|--------------|--------------|----------------|-------------------------------------|--------------------------|
| 4055          | 99.6                 | 1227.1              | 375796      | 293802       | 121          | 121            | hCoV-19/Canada/QC-WTD-qxic4055/2021 | EPI_ISL_10168587         |
| 4204          | 69.1                 | 116.5               | 503532      | 29803        | 3219         | 9245           | QC failure, not uploaded            | QC failure, not uploaded |
| 4205          | 95.8                 | 1096.8              | 370802      | 252101       | 674          | 1255           | hCoV-19/Canada/QC-WTD-qxic4205/2021 | EPI_ISL_10169675         |
| 4249          | 98.9                 | 1894.8              | 583638      | 460000       | 69           | 314            | hCoV-19/Canada/QC-WTD-qxic4249/2021 | EPI_ISL_10170149         |

\*

773 Genome coverage was calculated as the proportion of Wuhan-Hu-1 (MN908947.3) reference  
774 positions with at least 10X read mapping depth.

775 **Table 3.** Summary of mutations leading to amino acid changes found in sequences from four  
 776 SARS-CoV-2 positive white-tailed deer nasal swab samples from southern Québec, Canada,  
 777 November 6-8 2021

| Gene   | Amino Acid Mutation | Nucleotide Mutation | Nasal Swab ID(s)       | Max Allele Fraction* (%) | Major Variant? † |
|--------|---------------------|---------------------|------------------------|--------------------------|------------------|
| orf1ab | ΔM85                | TATG517T            | 4204                   | 88.9                     | Yes              |
| orf1ab | V1143F              | G3692T              | 4055; 4205; 4249       | 100                      | Yes              |
| orf1ab | A1306S              | G4181T              | 4055; 4204; 4205; 4249 | 100                      | Yes              |
| orf1ab | Q1784H              | G5617T              | 4055; 4204; 4205; 4249 | 100                      | Yes              |
| orf1ab | L1853F              | C5822T              | 4205                   | 91.4                     | Yes              |
| orf1ab | P2046L              | C6402T              | 4055; 4205; 4249       | 100                      | Yes              |
| orf1ab | H2125Y              | C6638T              | 4055; 4204; 4205; 4249 | 100                      | Yes              |
| orf1ab | S2224F              | C6936T              | 4249                   | 26.1                     | No               |
| orf1ab | S2242F              | C6990T              | 4204; 4205             | 100                      | Yes              |
| orf1ab | P2287S              | C7124T              | 4055; 4205; 4249       | 100                      | Yes              |
| orf1ab | A2554V              | C7926T              | 4055; 4204; 4205; 4249 | 100                      | Yes              |
| orf1ab | T2823I              | C8733T              | 4205                   | 100                      | Yes              |
| orf1ab | V2930L              | G9053T              | 4055; 4204; 4205; 4249 | 100                      | Yes              |
| orf1ab | L3116F              | C9611T              | 4205                   | 99.1                     | Yes              |
| orf1ab | T3255I              | C10029T             | 4055; 4204; 4205; 4249 | 100                      | Yes              |
| orf1ab | L3606F              | G11083T             | 4204; 4205; 4249       | 100                      | Yes              |
| orf1ab | T3646A              | A11201G             | 4055; 4204; 4205; 4249 | 100                      | Yes              |
| orf1ab | T4467I              | C13665T             | 4205                   | 98.5                     | Yes              |
| orf1ab | I4562M              | A13951G             | 4249                   | 35.9                     | No               |
| orf1ab | N4583K              | T14014G             | 4055; 4204; 4205; 4249 | 100                      | Yes              |
| orf1ab | H5401Y              | C16466T             | 4055; 4204; 4205; 4249 | 100                      | Yes              |
| orf1ab | I6162T              | T18750C             | 4055; 4249             | 99.7                     | Yes              |
| orf1ab | T6249I              | C19011T             | 4205                   | 99.7                     | Yes              |
| orf1ab | V6265A              | T19059C             | 4249                   | 37.5                     | No               |



|        |                       |                           |                           |      |     |
|--------|-----------------------|---------------------------|---------------------------|------|-----|
| orf1ab | T6436I                | C19572T                   | 4205                      | 100  | Yes |
| orf1ab | T6775I                | C20589T                   | 4055; 4205                | 100  | Yes |
| S      | T19R                  | C21618G                   | 4055; 4204; 4205;<br>4249 | 100  | Yes |
| S      | T22I                  | C21627T                   | 4055; 4204; 4205;<br>4249 | 100  | Yes |
| S      | A27V                  | C21642T                   | 4055; 4249                | 100  | Yes |
| S      | G142D                 | G21987A                   | 4055; 4249                | 57.6 | No  |
| S      | E156G, ΔFR157-<br>158 | GAGTTCA22028G             | 4055; 4205; 4249          | 100  | Yes |
| S      | L452R                 | T22917G                   | 4055; 4205; 4249          | 100  | Yes |
| S      | T478K                 | C22995A                   | 4055; 4249                | 100  | Yes |
| S      | D614G                 | A23403G                   | 4055; 4204; 4205;<br>4249 | 100  | Yes |
| S      | P681R                 | C23604G                   | 4055; 4204; 4205;<br>4249 | 100  | Yes |
| S      | D950N                 | G24410A                   | 4055; 4204; 4205;<br>4249 | 100  | Yes |
| S      | G1085R                | G24815A                   | 4055; 4204; 4205;<br>4249 | 100  | Yes |
| S      | T1117I                | C24912T                   | 4249                      | 35.0 | No  |
| ORF3a  | T12I                  | C25427T                   | 4205                      | 99.9 | Yes |
| ORF3a  | S26L                  | C25469T                   | 4055; 4204; 4205;<br>4249 | 100  | Yes |
| ORF3a  | R134H                 | G25793A                   | 4055; 4205; 4249          | 100  | Yes |
| M      | I82T                  | T26767C                   | 4055; 4204; 4205;<br>4249 | 100  | Yes |
| ORF7a  | T39I                  | C27509T                   | 4204; 4205                | 100  | Yes |
| ORF7a  | V82A                  | T27638C                   | 4055; 4205; 4249          | 100  | Yes |
| ORF7a  | T120I                 | C27752T                   | 4055; 4205; 4249          | 100  | Yes |
| ORF8   | S43F                  | C28021T                   | 4249                      | 29.9 | No  |
| ORF8   | L60F, Δ61-66          | TGTGCGTGGATGAGGCTGG28072T | 4205                      | 59.3 | No  |
| ORF8   | L60F                  | G28073T                   | 4055; 4249                | 100  | Yes |
| ORF8   | S67*, ΔK68            | TCTA28092T                | 4205                      | 95.6 | Yes |
| ORF8   | ΔDF119-120            | AGATTTTC28247A            | 4055; 4205; 4249          | 87.2 | Yes |
| ORF8   | F120L                 | C28253A                   | 4055; 4249                | 100  | Yes |
| N      | D63G                  | A28461G                   | 4055; 4204; 4205;<br>4249 | 100  | Yes |

|   |       |         |                           |     |     |
|---|-------|---------|---------------------------|-----|-----|
| N | R203M | G28881T | 4055; 4204; 4205;<br>4249 | 100 | Yes |
| N | G215C | G28916T | 4055; 4204; 4205;<br>4249 | 100 | Yes |
| N | D377Y | G29402T | 4055; 4204; 4205;<br>4249 | 100 | Yes |

---

\*

778 The maximum allele fraction for each variant observed in all sequenced samples was  
779 calculated from the number of alternate allele observations divided by the total number of  
780 observations for each variant site.

†

781 A variant with an allele fraction of at least 0.75 or 75% was classified as a major variant.

782 **Table 4.** Top 10 up and down differentially expressed WTD genes ranked by adjusted *p*-value.

| Log <sub>2</sub> fold change | Adjusted <i>p</i> -value | WTD gene name                                                                        | Inferred human ortholog* |
|------------------------------|--------------------------|--------------------------------------------------------------------------------------|--------------------------|
| <b>Up</b>                    |                          |                                                                                      |                          |
| 5.42                         | 1.49x10 <sup>-13</sup>   | interferon-induced transmembrane protein 1-like ( <i>LOC110149612</i> )              | <i>IFITM1</i>            |
| 5.50                         | 1.84x10 <sup>-11</sup>   | interferon alpha-inducible protein 27-like protein 2A ( <i>LOC110122860</i> )        |                          |
| 4.84                         | 2.75x10 <sup>-8</sup>    | interferon-induced transmembrane protein 1-like ( <i>LOC110149600</i> )              | <i>IFITM1</i>            |
| 6.34                         | 9.71x10 <sup>-8</sup>    | 2'-5'-oligoadenylate synthetase 2 ( <i>OAS2</i> )                                    |                          |
| 3.96                         | 9.12x10 <sup>-6</sup>    | pleckstrin homology domain-containing family A member 4-like ( <i>LOC110133690</i> ) |                          |
| 3.57                         | 1.66x10 <sup>-5</sup>    | hematopoietic SH2 domain containing ( <i>HSH2D</i> )                                 | <i>HSH2D</i>             |
| 3.44                         | 1.66x10 <sup>-5</sup>    | DNA dC->dU-editing enzyme APOBEC-3H-like ( <i>LOC110129971</i> )                     | <i>APOBEC3H</i>          |
| 6.12                         | 2.70x10 <sup>-5</sup>    | zonadhesin ( <i>ZAN</i> )                                                            | <i>ZAN</i>               |
| 4.24                         | 6.32x10 <sup>-5</sup>    | complement C4-A-like ( <i>LOC110139391</i> )                                         | <i>C4B_2</i>             |
| 2.95                         | 7.22x10 <sup>-5</sup>    | transporter 1, ATP binding cassette subfamily B member ( <i>TAP1</i> )               | <i>TAP1</i>              |
| <b>Down</b>                  |                          |                                                                                      |                          |
| -25.49                       | 5.00x10 <sup>-7</sup>    | heterogeneous nuclear ribonucleoprotein A1-like ( <i>LOC110141849</i> )              |                          |
| -22.66                       | 2.23x10 <sup>-5</sup>    | cuticlin-2-like ( <i>LOC110149771</i> )                                              |                          |
| -22.56                       | 2.31x10 <sup>-5</sup>    | ornithine decarboxylase antizyme 1-like ( <i>LOC110136472</i> )                      |                          |
| -21.26                       | 9.82x10 <sup>-5</sup>    | heterogeneous nuclear ribonucleoprotein A1-like ( <i>LOC110143697</i> )              |                          |
| -2.90                        | 1.42x10 <sup>-4</sup>    | testis expressed 9 ( <i>TEX9</i> )                                                   | <i>TEX9</i>              |
| -2.48                        | 1.43x10 <sup>-4</sup>    | G protein subunit alpha 14 ( <i>GNA14</i> )                                          | <i>GNA11</i>             |
| -3.82                        | 2.68x10 <sup>-4</sup>    | janus kinase and microtubule interacting protein 2 ( <i>JAKMIP2</i> )                | <i>JAKMIP2</i>           |
| -2.82                        | 5.32x10 <sup>-4</sup>    | coiled-coil domain containing 181 ( <i>CCDC181</i> )                                 | <i>CCDC181</i>           |
| -2.14                        | 5.68x10 <sup>-4</sup>    | homer scaffold protein 2 ( <i>HOMER2</i> )                                           | <i>HOMER2</i>            |
| -3.04                        | 5.68x10 <sup>-4</sup>    | histamine receptor H1 ( <i>HRH1</i> )                                                | <i>HRH1</i>              |

783 \* If left blank, no human ortholog could be predicted with OrthoFinder.

784 **Figures:**

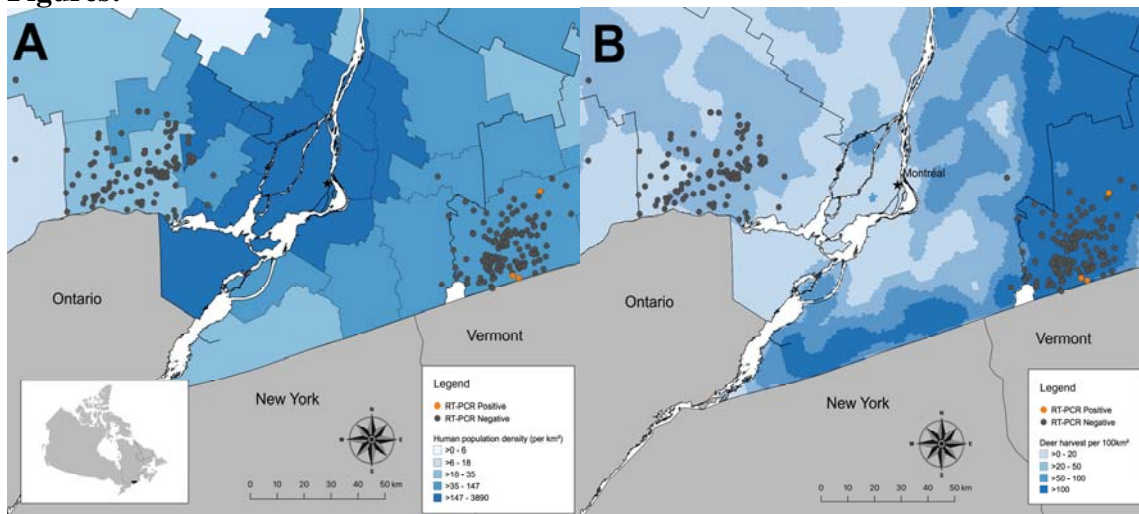

785  
786 **Figure 1.** Map of southern Québec with locations of SARS-CoV-2 RT-PCR-positive (orange) and -negative (grey)  
787 white-tailed deer from November 6 - 8 2021 superimposed on (A) a choropleth map of human population density  
788 (per km<sup>2</sup>) by regional county municipalities (thin grey boundaries) and (B) a heatmap of deer harvest density per  
789 100km<sup>2</sup> from 2020 as a proxy for deer population density. Inset shows location of Québec (outlined) and study  
790 region (shaded black) within Canada.

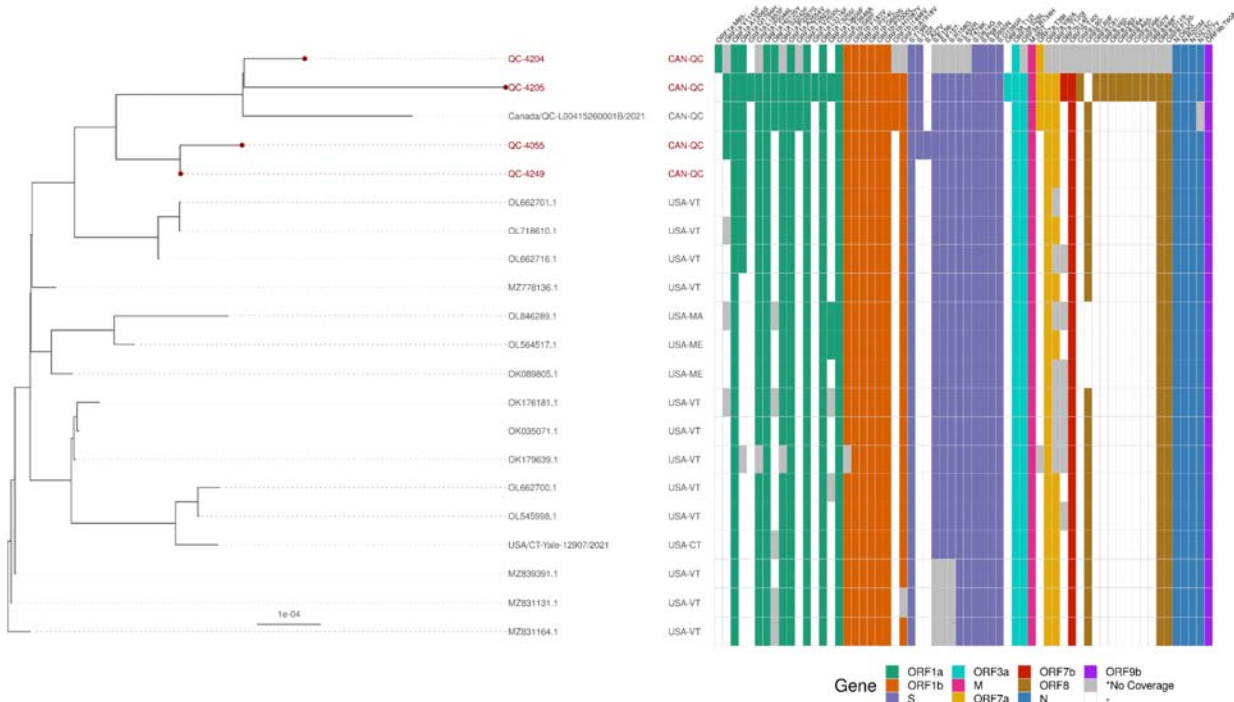

791  
792 **Figure 2.** Whole- genome phylogenetic tree of four SARS-CoV-2 positive white-tailed deer sequences and 17  
793 closely related Canadian and American sequences identified by UShER analysis. IQ-TREE inferred the maximum-  
794 likelihood phylogenetic tree with a GTR+F+I+R5 substitution model (selected by IQ-TREE's ModelFinder) from  
795 a Nextalign multiple sequence alignment of the 4 WTD, 91 NCBI, 2 GISAID and Wuhan-Hu-1 (MN908947.3)  
796 sequences. The tree was manually pruned with BioPython to highlight distinct clades and amino acid mutation  
797 patterns. The tree was visualized using the ggtree R library. Amino acid (AA) substitutions and deletions in GISAID  
798 and white-tailed deer sequences were determined using Nextclade for visualization alongside the tree and other  
799 metadata. Some positions within sample 4204 had low or no coverage, however, despite the poor coverage of  
800 sample 4204, it still clustered with the other white-tailed deer sequences.



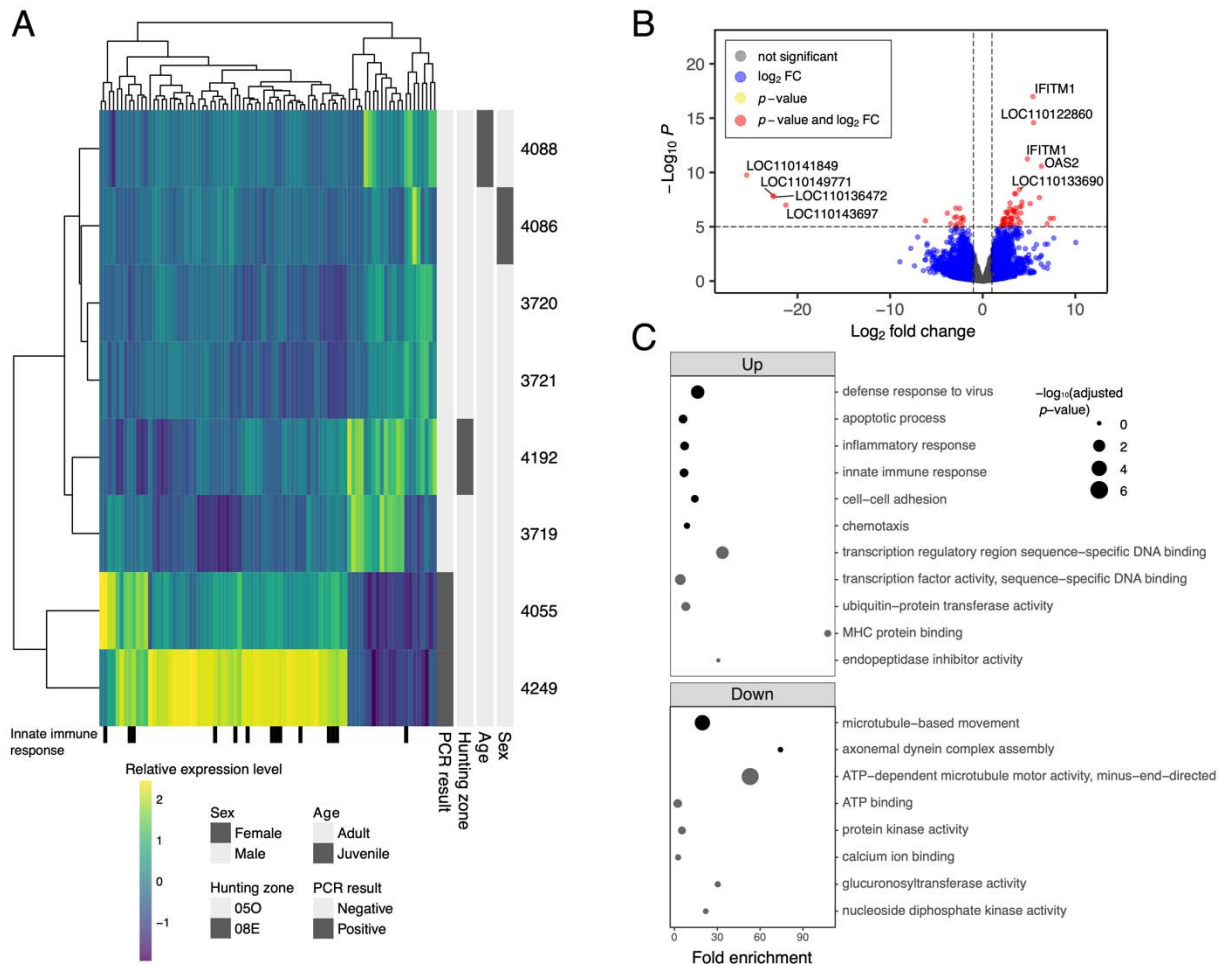

801  
 802 **Figure 3.** RNAseq analysis of deer nasopharyngeal swabs comparing healthy deer with SARS-CoV-2 infected deer  
 803 (4055 and 4249). A) Relative expression levels of significant (adjusted  $p$ -value < 0.05) differentially expressed  
 804 genes with an absolute fold change greater than 3. Deer genes with human orthologs annotated with the Gene  
 805 Ontology “innate immune response” term indicated underneath. B) Volcano plot of the DESeq2 differential gene  
 806 expression analysis results. Where possible, genes were labelled with their inferred human ortholog gene name. The  
 807 upper *IFITM1* is associated with *LOC110149600* and the lower *IFITM1* is associated with *LOC110149612* in the  
 808 deer genome. C) Gene Ontology function enrichment of the significant up and down-differentially expressed genes  
 809 against a deer genome background with DAVID. Only terms from biological processes (black dots) and molecular  
 810 functions (grey dots) are displayed.



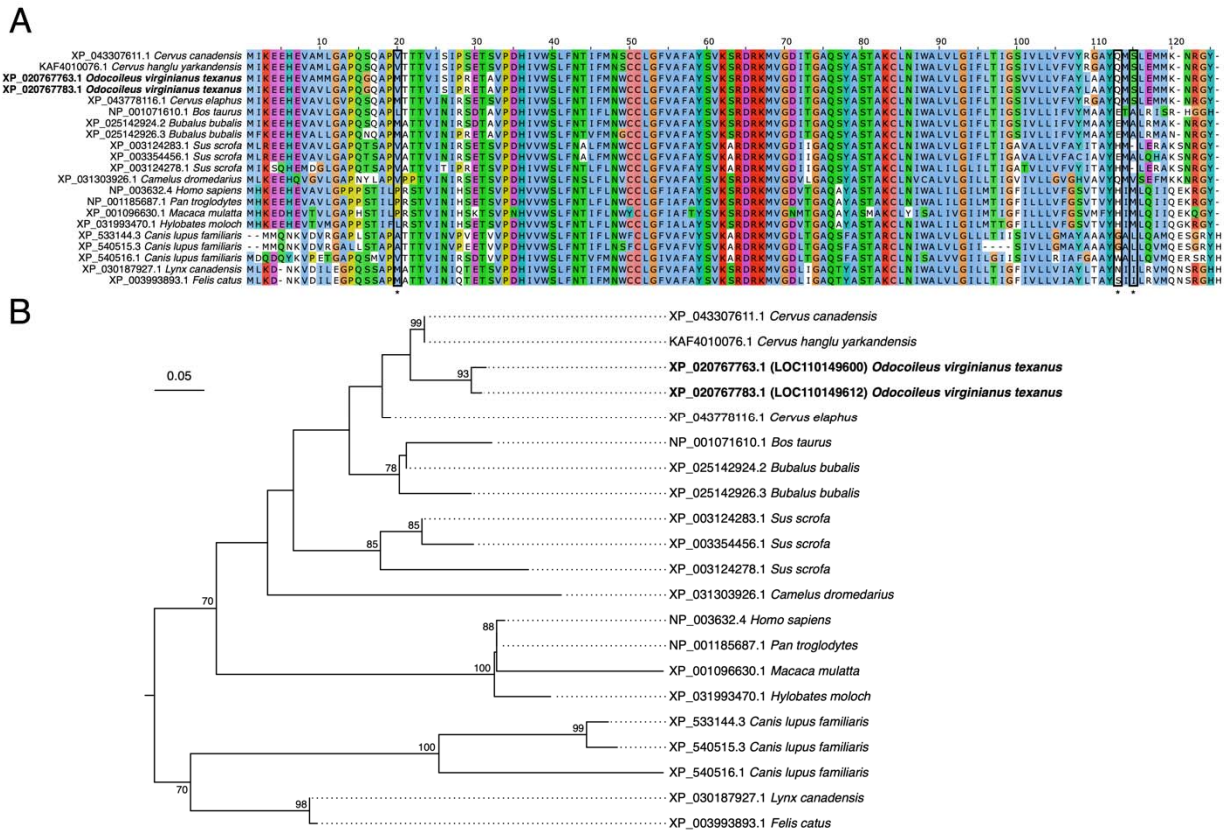

**Figure 5.** Phylogenetic analysis of IFITM1 in mammals reveals lineage-specific duplications in deer and evolutionary diversification. A) Alignment of IFITM1 from select boreoeutherian mammals. An extended N-terminal start to XP\_043307611.1 (*Cervus canadensis*) and XP\_025142924.2 (*Bubalus bubalis*) has been trimmed from the alignment. Boxed and asterisked positions 20, 113 and 115 were identified as sites of diversifying selection. Alignment is coloured with the Clustal colour scheme with poorly conserved residues left white using Jalview v2.11.2.6. B) A mid-point rooted tree of IFITM1 from select boreoeutherian mammals. Bootstrap values less than 70 were not displayed.
